# Supplementary material for: A machine learning method for the discovery of minimum marker gene combinations for cell type identification from single-cell RNA sequencing
Source: PubMed Central journal article supplement — Genome Res. 2021 Oct;31(10):1767–80. doi: 10.1101/gr.275569.121 (PMC8494219; doi:10.1101/gr.275569.121), 2021-10
Supplement: supp_gr.275569.121_Supplementary_Figures.pdf [file supp_gr.275569.121_Supplementary_Figures.pdf]

# Supplemental Figures

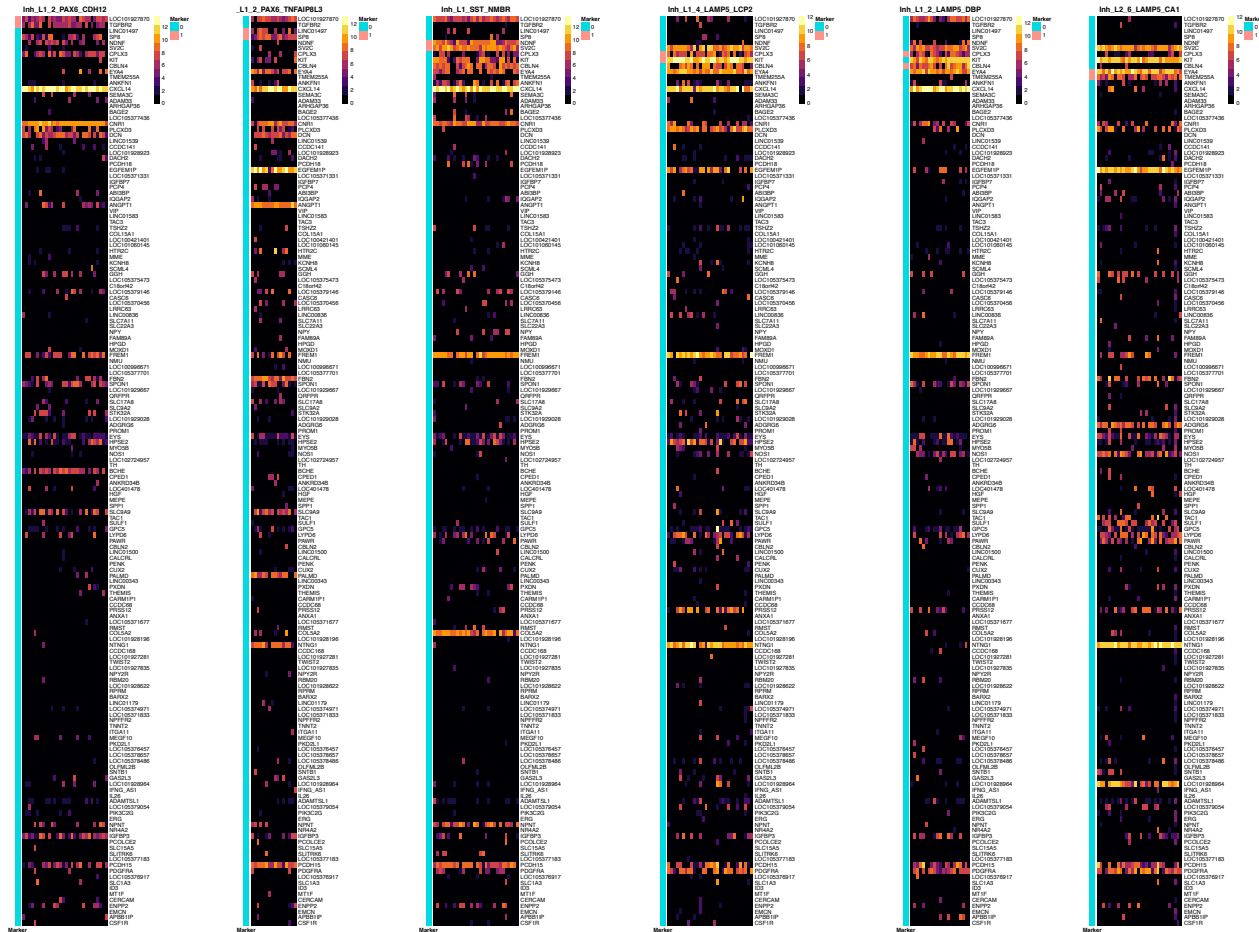

**Supplemental Fig S1: NS-Forest v2.0 barcodes for human MTG *LAMP5/PAX6* branch.** Cell type clusters were grouped based on upper-level branch nodes in the hierarchical cluster dendrogram shown in Figure 3. Log2 CPMs are plotted as a heatmap with the 157 marker genes as rows and individual nuclei as columns.

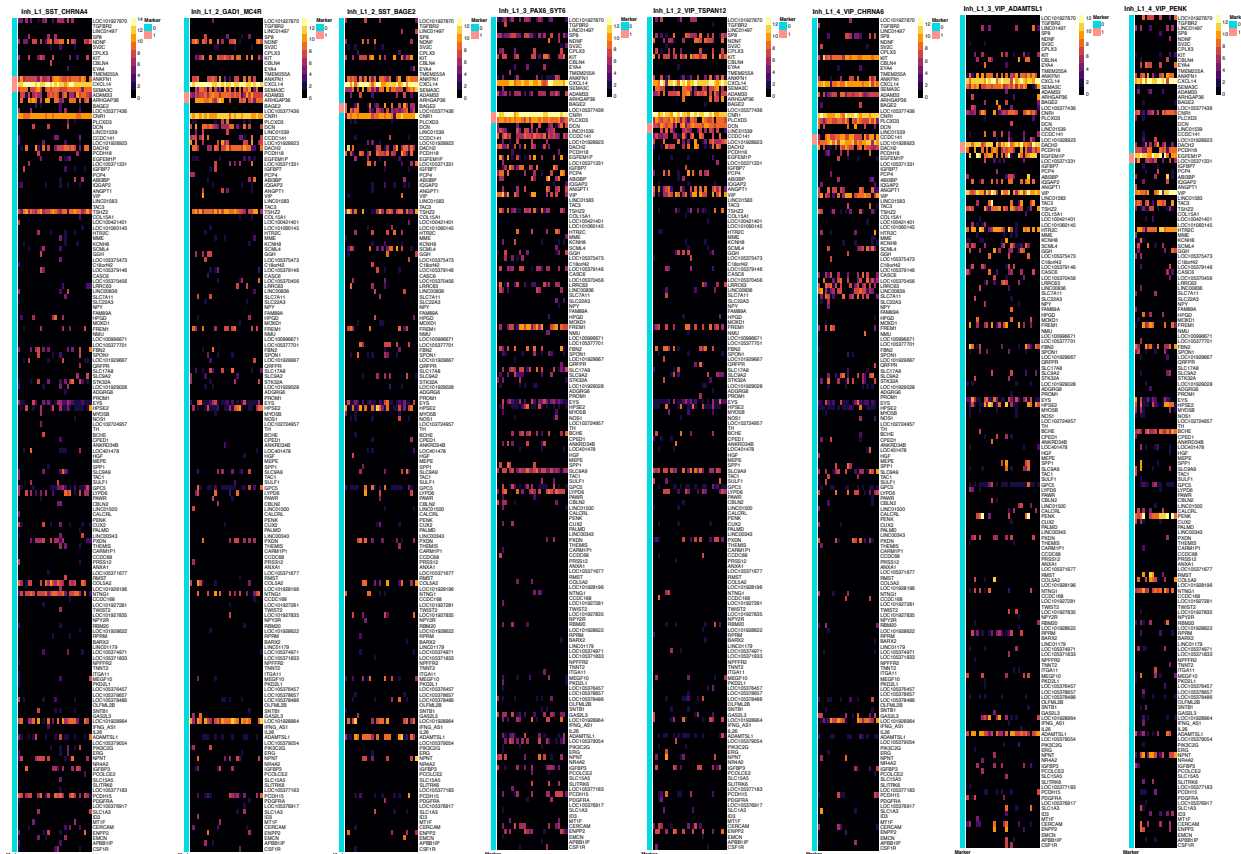

**Supplemental Fig S2: NS-Forest v2.0 barcodes for human MTG VIP left branch.** Cell type clusters were grouped based on upper-level branch nodes in the hierarchical cluster dendrogram shown in Figure 3. Log2 CPMs are plotted as a heatmap with the 157 marker genes as rows and individual nuclei as columns.

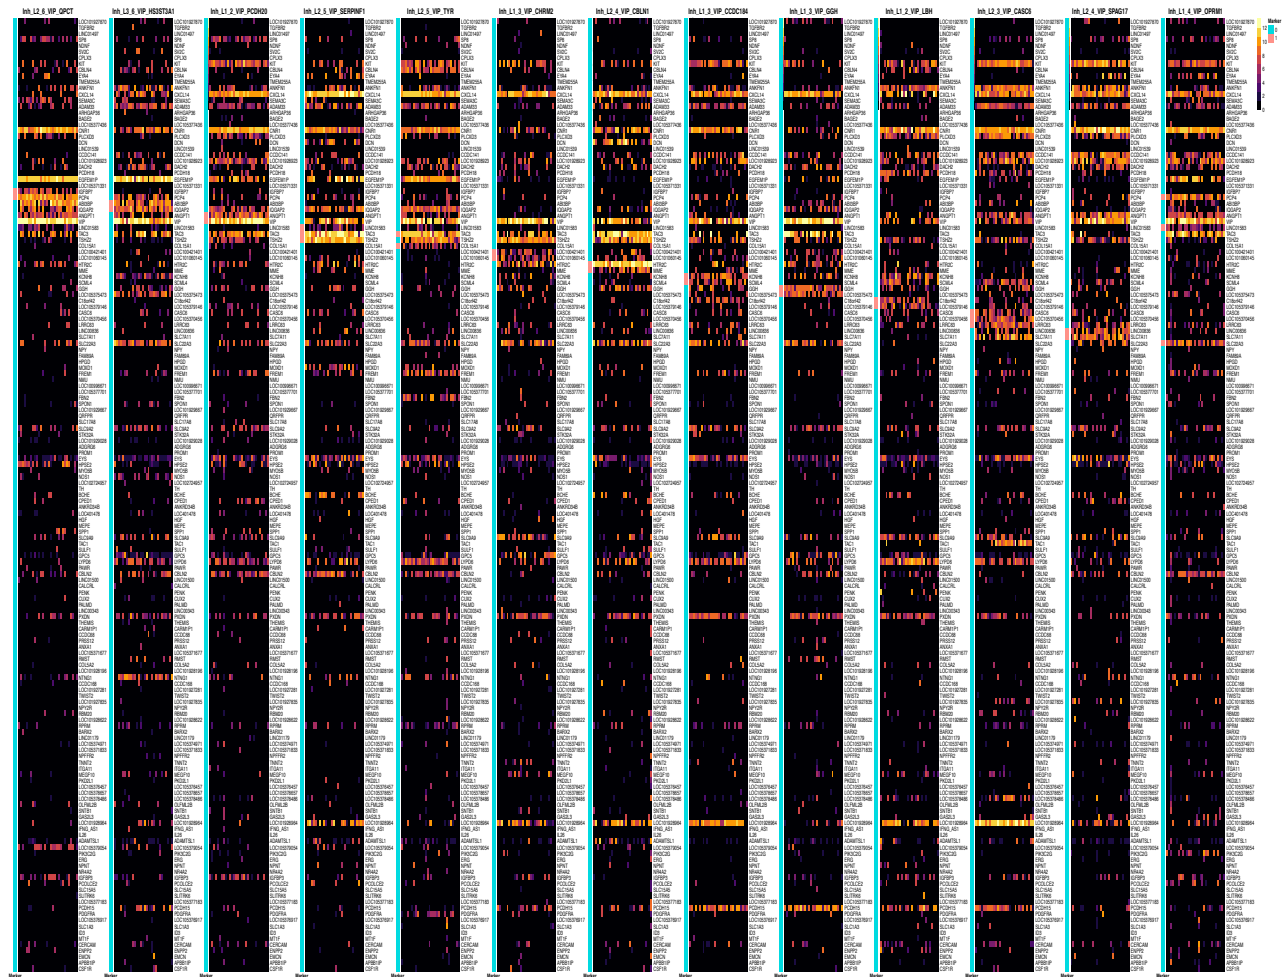

**Supplemental Fig S3: NS-Forest v2.0 barcodes for human MTG *VIP* right branch.** Cell type clusters were grouped based on upper-level branch nodes in the hierarchical cluster dendrogram shown in Figure 3. Log<sub>2</sub> CPMs are plotted as a heatmap with the 157 marker genes as rows and individual nuclei as columns.

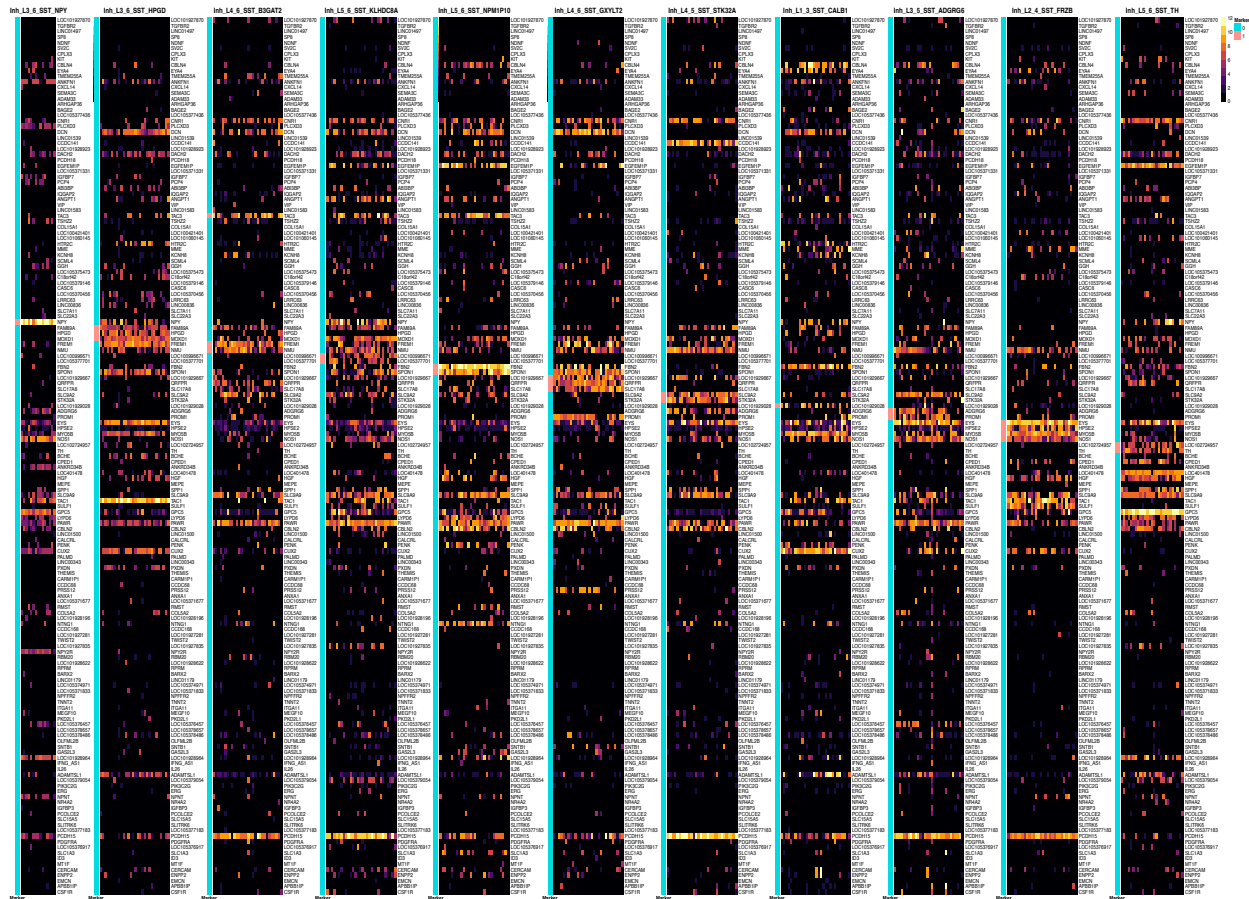

**Supplemental Fig S4: NS-Forest v2.0 barcodes for human MTG SST branch.** Cell type clusters were grouped based on upper-level branch nodes in the hierarchical cluster dendrogram shown in Figure 3. Log<sub>2</sub> CPMs are plotted as a heatmap with the 157 marker genes as rows and individual nuclei as columns.

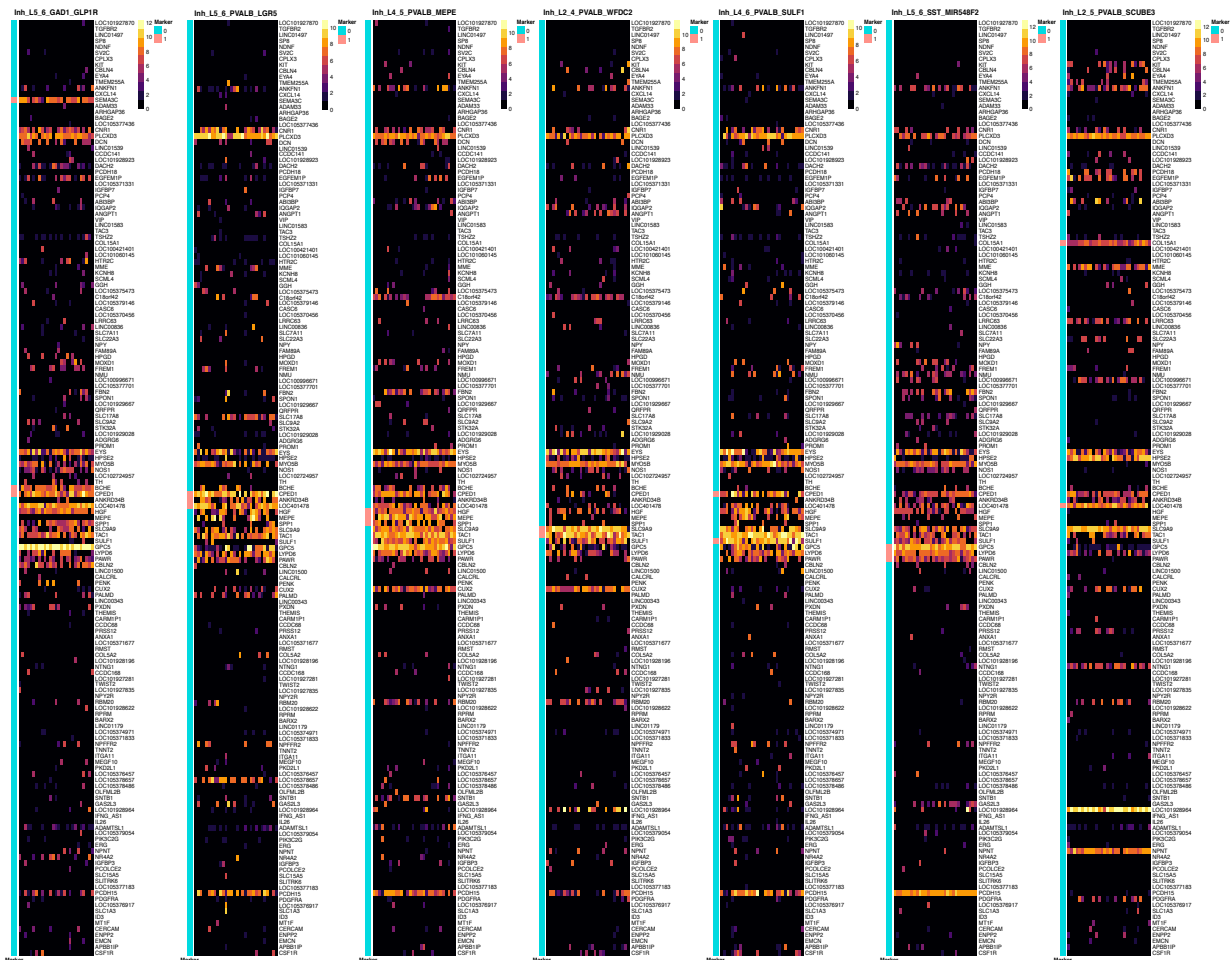

**Supplemental Fig S5: NS-Forest v2.0 barcodes for human MTG *PVALB* branch.** Cell type clusters were grouped based on upper-level branch nodes in the hierarchical cluster dendrogram shown in Figure 3. Log2 CPMs are plotted as a heatmap with the 157 marker genes as rows and individual nuclei as columns.

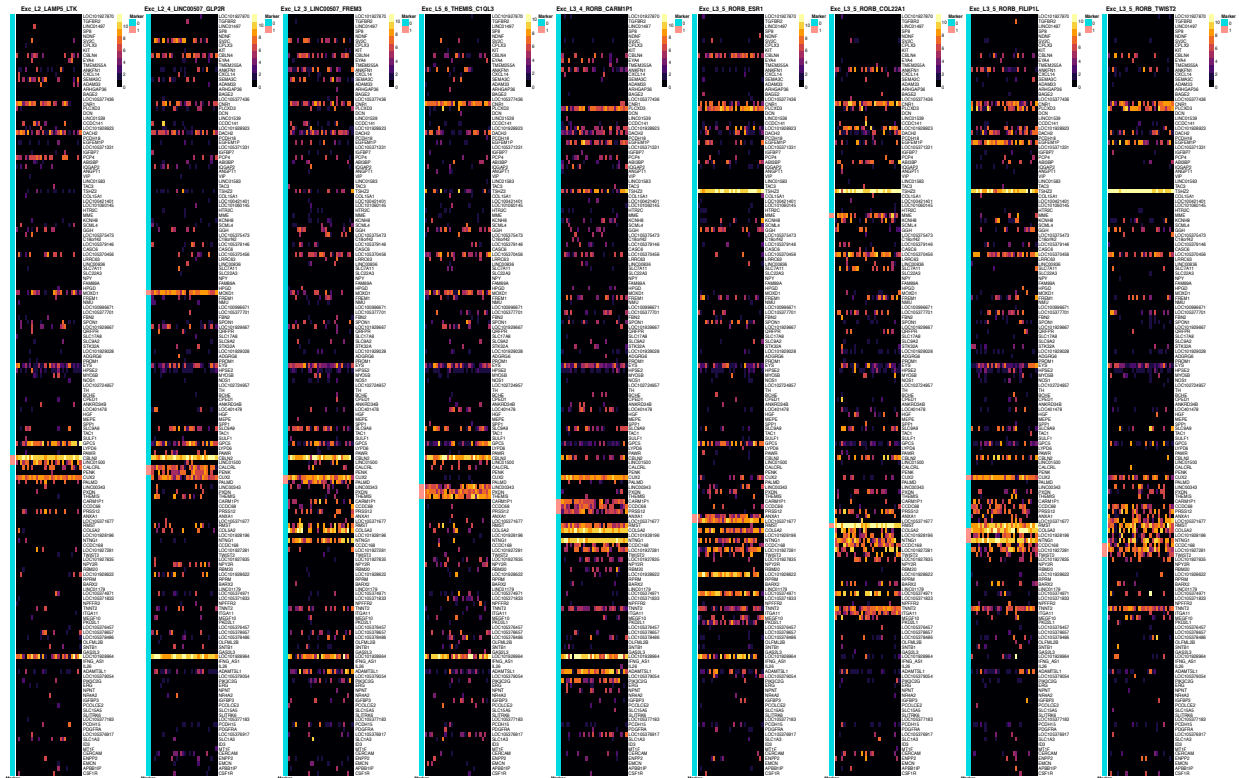

**Supplemental Fig S6: NS-Forest v2.0 barcodes for human MTG *RORB* left branch.** Cell type clusters were grouped based on upper-level branch nodes in the hierarchical cluster dendrogram shown in Figure 3. Log<sub>2</sub> CPMs are plotted as a heatmap with the 157 marker genes as rows and individual nuclei as columns.

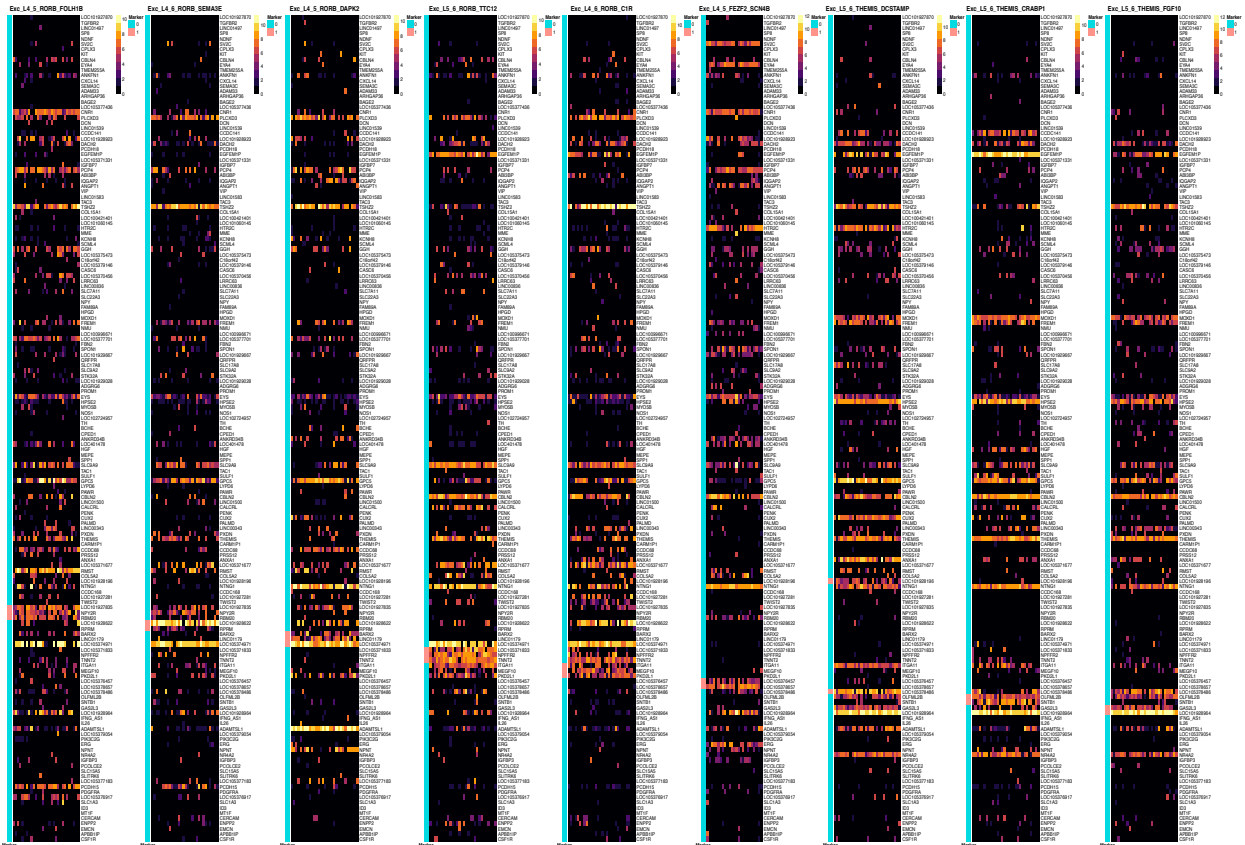

**Supplemental Fig S7: NS-Forest v2.0 barcodes for human MTG *RORB* right branch.**

Cell type clusters were grouped based on upper-level branch nodes in the hierarchical cluster dendrogram shown in Figure 3. Log<sub>2</sub> CPMs are plotted as a heatmap with the 157 marker genes as rows and individual nuclei as columns.





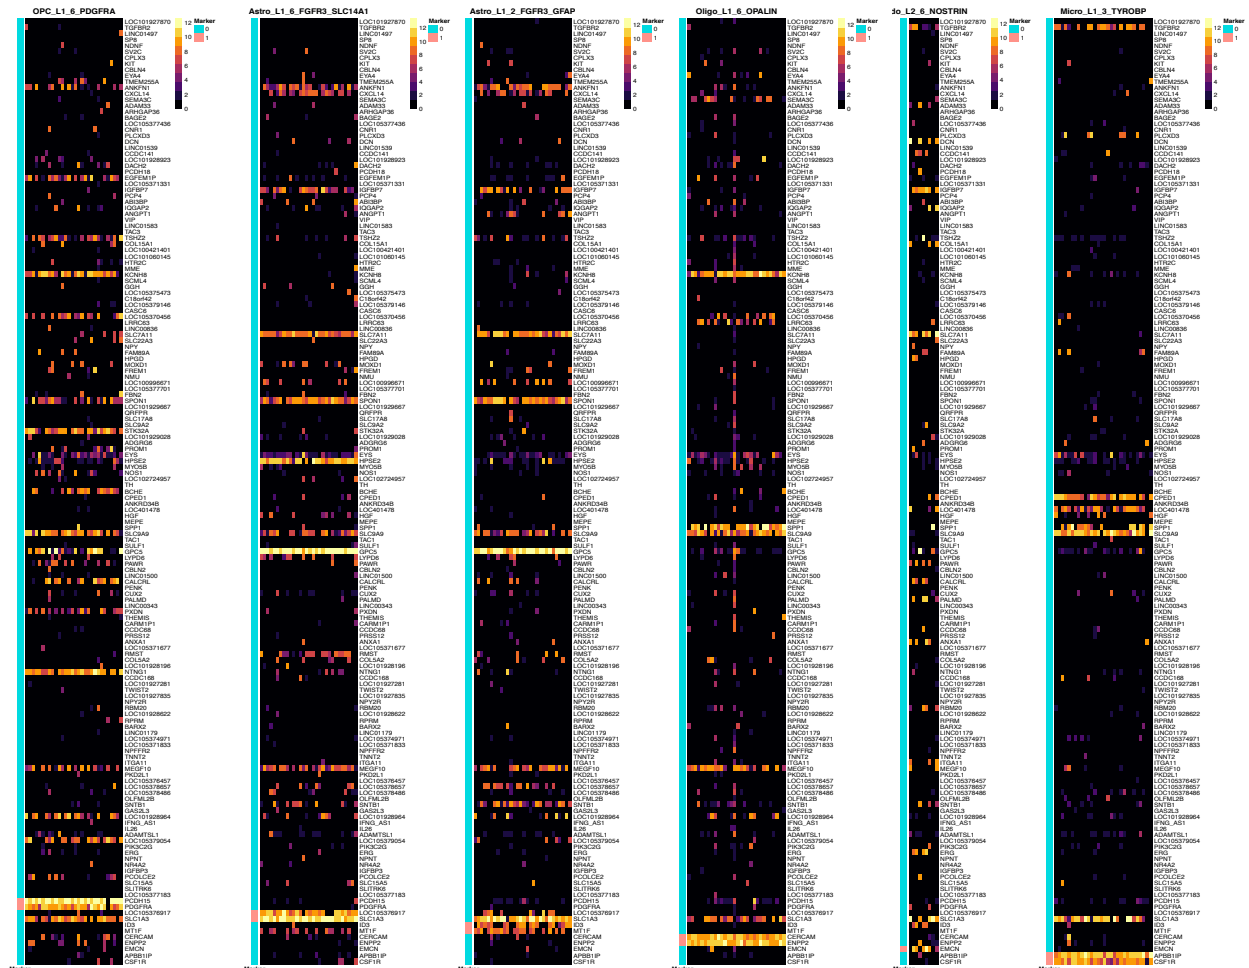

**Supplemental Fig S9: NS-Forest v2.0 barcodes for human MTG non-neuronal branch.** Cell type clusters were grouped based on upper-level branch nodes in the hierarchical cluster dendrogram shown in Figure 3. Log<sub>2</sub> CPMs are plotted as a heatmap with the 157 marker genes as rows and individual nuclei as columns.

| Complete Clusters       | NS-Forest v2.0          | COMET          | RANKCORR                             |
|-------------------------|-------------------------|----------------|--------------------------------------|
| Cluster_0               | CD14, CSF3R             | ITGAM, CD44    | CD14, VCAN, S100A12, S100A8          |
| Cluster_1               | CD1C, FCER1A            | S100A9, CD74   | CD1C, FCER1A, CLEC10A                |
| Cluster_2               | TMEM176B, FCGR3A        | IFITM3, ICAM4  | LOC200772, AK307192, TCF7L2, FCGR3A, |
| Cluster_3               | GZMB                    | SLAMF7, CTSB   | DERL3, MZB1, TSPAN13                 |
| Cluster_4               | CLEC9A, C1ORF54         | FLT3, ECE1     | CADM1, CLEC9A, C1ORF54               |
| Cluster_5               | LAIR2, FCGR3A, IFI30, F | CSF1R, CTSB    | LAIR2, IFI30, FTL, PSAP              |
| Cluster_6               | SIGLEC6, AXL            | EPHB4, CXCR2   | HAMP, GPR146, PPP1R14A               |
| Cluster_7               | PRF1, GNLY              | IFITM1, CCND2  | FGFBP2, KLRC4_KLRK1, IL2RB           |
|                         |                         |                |                                      |
|                         |                         |                |                                      |
|                         |                         |                |                                      |
| Dendritic Only Clusters | NS-Forest v2.0          | COMET          | RANKCORR                             |
| Clusters_0              | FCGR3A, SERPINA1        | FCER1G, IFITM3 | TCF7L2, AK307192, MTSS1              |
| Clusters_1              | GZMB                    | NRP1, SELL     | DERL3, AK128525, MZB1                |
| Clusters_2              | CLEC9A                  | FLT3, IDO1     | CADM1, CLEC9A, C1ORF54               |
| Clusters_3              | CD1C, FCER1A            | FCER1A, CD33   | CD1C, FCER1A, CLEC10A                |
| Clusters_4              | CD14, S100A9            | CD14, S100A8   | CD14, RNASE2, S100A8                 |
| Clusters_5              | AXL                     | CD22, AXL      | BDKRB2, HAMP, PPP1R14A, SIGLEC6      |

**Supplemental Figure S10: Marker genes from NS-Forest, COMET, and RANKCORR.** A) markers for the clustering solution for all monocyte and dendritic cells. B) markers for the clustering solution for dendritic cells only.

A

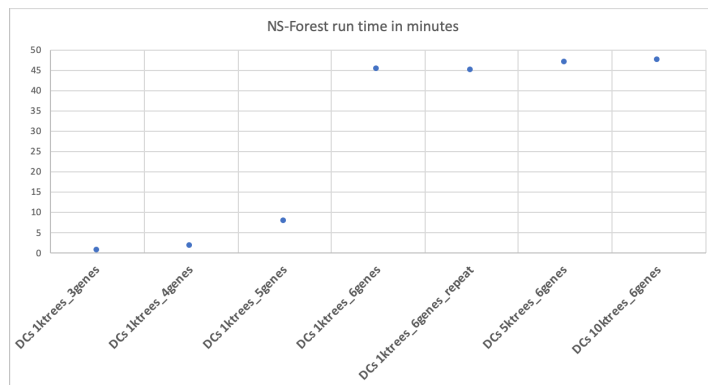

B

| Cluster    | Default 10k trees | DCs 5k trees | DCs 1k trees | DCs 1k trees 5genes | DCs 1k trees 4genes | DCs 1k trees 3genes |
|------------|-------------------|--------------|--------------|---------------------|---------------------|---------------------|
| Clusters_0 | 0.99              | 0.99         | 0.99         | 0.99                | 0.99                | 0.99                |
| Clusters_1 | 1.00              | 1.00         | 1.00         | 1.00                | 1.00                | 1.00                |
| Clusters_2 | 0.98              | 0.98         | 0.98         | 0.98                | 0.98                | 0.98                |
| Clusters_3 | 0.76              | 0.76         | 0.76         | 0.76                | 0.75                | 0.75                |
| Clusters_4 | 0.87              | 0.87         | 0.87         | 0.86                | 0.85                | 0.84                |
| Clusters_5 | 0.92              | 0.92         | 0.92         | 0.92                | 0.77                | 0.76                |

**Supplemental Figure S11: Bench marking results for NS-Forest v2.0 using the dendritic cell subset from Villani et al, 2017.** A) Varying the number of trees or the number of top genes for permutation. B) Resulting F-beta scores from varied parameters in panel A.

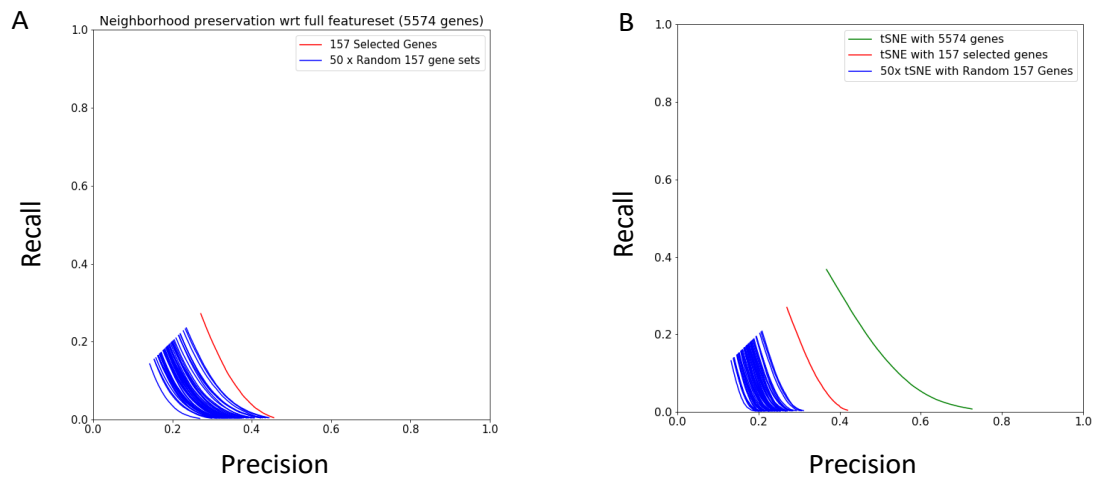

**Supplemental Fig S12: Quantitative assessment of Nearest Neighbor Preservation metric** - A) Nearest Neighbor Preservation (NNP) curves for the random-forest selected 157 genes (red) for 50 random gene sets of the same size (selected from the full 5574 high-variance gene set)(blue) are shown. B) NNP curves for t-SNEs generated from the complete 5574 variable genes (green), the random-forest selected 157 genes (red), or for 50 random gene sets of the same size (selected from the full 5574 high-variance gene set) (blue) are shown.

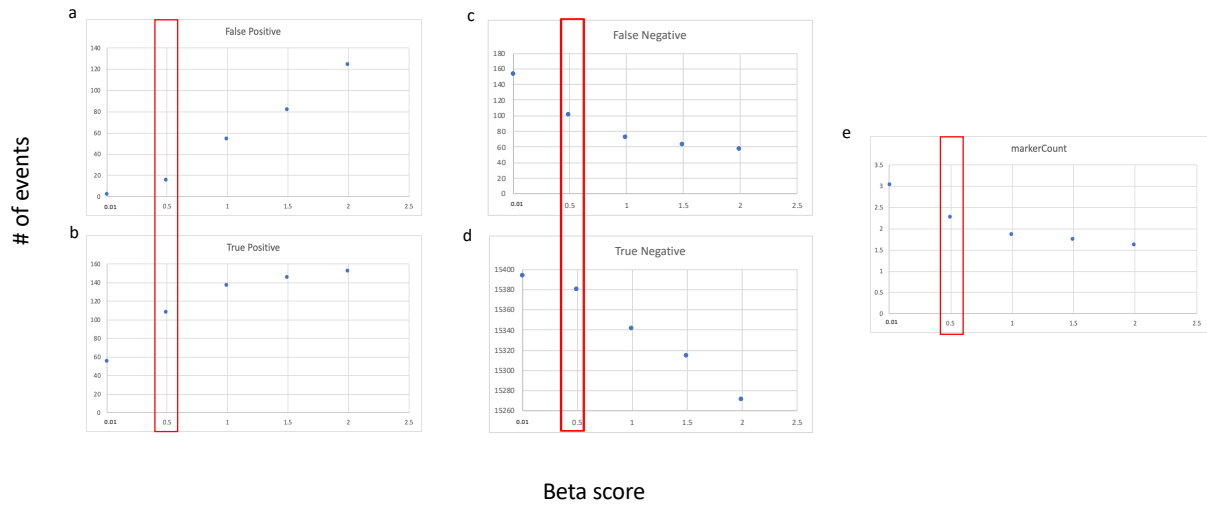

**Supplemental Fig S13: Empirical determination of the beta weighting parameter for the F-beta score** – For beta values of 0.01, 0.5, 1, 1.5 and 2 (x-axis), the average true positive (TP), false positive (FP), false negative (FN), and true negative (TN) values, and number of markers were calculated for all 75 clusters from the MTG data.
