# Supplementary material for: A machine learning method for the discovery of minimum marker gene combinations for cell type identification from single-cell RNA sequencing
Source: HighWire-hosted journal article supplement (doi:10.1101/gr.275569.121), 2021-06-04
Supplement: Supplemental_Table_S1.xlsx [file Supplemental_Table_S1.xlsx]

## Sheet: AIBS_Ref76_NSForest_v1.3_Result
Supplemental Table S1: NS-Forest v1.3 results for full Middle Temporal Gyrus.
clusterName	f-measure	markerCount	1	2	3	4	5	6
Astro_L1_2_FGFR3_GFAP	0.698113	2	AQP4	DPP10
Astro_L1_6_FGFR3_SLC14A1	0.798144	1	GPM6A
Endo_L2_6_NOSTRIN	0.454545	3	ITIH5	EMCN	SLC7A5
Exc_L2_3_LINC00507_FREM3	0.661157	2	RFX3	DGKB
Exc_L2_4_LINC00507_GLP2R	0.434251	3	CBLN2	MOXD1	CALCRL
Exc_L2_LAMP5_LTK	0.617705	2	CBLN2	PDGFD
Exc_L3_4_RORB_CARM1P1	0.691057	2	CARM1P1	CNTNAP5
Exc_L3_5_RORB_COL22A1	0.679389	2	RMST	COL22A1
Exc_L3_5_RORB_ESR1	0.786632	1	LOC105371677
Exc_L3_5_RORB_FILIP1L	0.478964	3	PLCH1	HS6ST3	RMST
Exc_L3_5_RORB_TWIST2	0.375587	3	PLCH1	SLC22A24	LOC105377788
Exc_L4_5_FEZF2_SCN4B	0.717949	3	LOC105378657	ESRRG	VAT1L
Exc_L4_5_RORB_DAPK2	0.576642	3	ADAMTSL1	PHACTR2	GRIK2
Exc_L4_5_RORB_FOLH1B	0.637046	2	LOC105377701	DPP10
Exc_L4_6_FEZF2_IL26	0.812598	1	IFNG_AS1
Exc_L4_6_RORB_C1R	0.526316	3	LOC105375974	PDZRN4	SEMA6D
Exc_L4_6_RORB_SEMA3E	0.651842	2	LOC101928622	SEMA3E
Exc_L5_6_FEZF2_ABO	0.727273	2	ADAMTSL1	LOC440896
Exc_L5_6_FEZF2_EFTUD1P1	0.705411	2	OLFML2B	DLC1
Exc_L5_6_RORB_TTC12	0.620155	3	NPFFR2	ADAMTS17	PDE4D
Exc_L5_6_SLC17A7_IL15	0.636364	3	HS3ST4	LHFPL3	SORCS3
Exc_L5_6_THEMIS_C1QL3	0.689142	2	THEMIS	NFIA
Exc_L5_6_THEMIS_CRABP1	0.702929	2	POSTN	SNTB1
Exc_L5_6_THEMIS_DCSTAMP	0.719101	2	SORBS2	LOC101928196
Exc_L5_6_THEMIS_FGF10	0.538462	2	ZNF804B	LOC101928964
Exc_L6_FEZF2_OR2T8	0.5	5	LOC105371310	SLC1A2	DPYD	ROBO2	SLITRK6
Exc_L6_FEZF2_SCUBE1	0.610526	2	SCUBE1	VCAN
Inh_L1_2_GAD1_MC4R	0.601942	2	ADAM33	SORCS1
Inh_L1_2_LAMP5_DBP	0.230769	4	CACNA2D1	CPLX3	TMEM178B	LINC00266_1
Inh_L1_2_PAX6_CDH12	0.642424	2	DDR2	IL1RAPL2
Inh_L1_2_PAX6_TNFAIP8L3	0.692308	2	ANGPT1	ALK
Inh_L1_2_SST_BAGE2	0.525773	3	INPP4B	SYT10	GRB14
Inh_L1_2_VIP_LBH	0.594595	3	PRR16	EDIL3	LYPD6
Inh_L1_2_VIP_PCDH20	0.623853	3	VIP	CNR1	GRID2
Inh_L1_2_VIP_TSPAN12	0.571429	3	CCK	DCN	ASIC2
Inh_L1_3_PAX6_SYT6	0.784314	2	CNR1	PCLO
Inh_L1_3_SST_CALB1	0.670659	2	GRIK1	CDH12
Inh_L1_3_VIP_ADAMTSL1	0.655462	2	THSD7B	DACH2
Inh_L1_3_VIP_CCDC184	0.374101	3	LOC101928842	ZMAT4	TBL1X
Inh_L1_3_VIP_CHRM2	0.563574	3	THSD7A	LINGO2	CNTN3
Inh_L1_3_VIP_GGH	0.520325	3	THSD7A	LOC105375473	CDH13
Inh_L1_4_LAMP5_LCP2	0.776163	1	KIT
Inh_L1_4_VIP_CHRNA6	0.512821	3	LOC101928923	CDH9	CCDC141
Inh_L1_4_VIP_OPRM1	0.571429	3	VIP	TRPC6	PCP4
Inh_L1_4_VIP_PENK	0.692308	3	PENK	EGFEM1P	MIR4500HG
Inh_L1_SST_CHRNA4	0.537634	3	CNTN5	SEMA3C	COL12A1
Inh_L1_SST_NMBR	0.759857	1	RELN
Inh_L2_3_VIP_CASC6	0.533333	3	ALCAM	ZMAT4	EFEMP1
Inh_L2_4_PVALB_WFDC2	0.676692	2	SLC9A9	ERBB4
Inh_L2_4_SST_FRZB	0.381818	6	EYS	ZNF385D	GRIP1	VWA2	LOC392232	TENM3
Inh_L2_4_VIP_CBLN1	0.603175	2	HTR2C	TAC3
Inh_L2_4_VIP_SPAG17	0.394737	3	ALCAM	KCNG2	HTR4
Inh_L2_5_PVALB_SCUBE3	0.730769	2	CNTN5	CA8
Inh_L2_5_VIP_SERPINF1	0.589286	2	SOX2_OT	NBEA
Inh_L2_5_VIP_TYR	0.618182	2	TAC3	CBLN4
Inh_L2_6_LAMP5_CA1	0.719212	2	TMEM255A	UNC5D
Inh_L2_6_VIP_QPCT	0.655738	3	VIP	TRPC4	PCP4
Inh_L3_5_SST_ADGRG6	0.553506	2	GRIK1	ADGRG6
Inh_L3_6_SST_HPGD	0.727273	3	SPHKAP	RGS5	PCDH7
Inh_L3_6_SST_NPY	0.846154	1	NPY
Inh_L3_6_VIP_HS3ST3A1	0.64	3	IQGAP2	THSD7B	EGFEM1P
Inh_L4_5_PVALB_MEPE	0.582524	3	MEPE	GPC5	TRPC4
Inh_L4_5_SST_STK32A	0.62069	3	NMU	STK32A	TENM1
Inh_L4_6_PVALB_SULF1	0.571429	2	SULF1	PIEZO2
Inh_L4_6_SST_B3GAT2	0.542254	3	SST	TAC3	CACNB2
Inh_L4_6_SST_GXYLT2	0.605263	2	NDST4	SPHKAP
Inh_L5_6_GAD1_GLP1R	0.625	2	CSMD3	TRPM3
Inh_L5_6_PVALB_LGR5	0.554217	3	SLIT2	FGF12	SLC17A8
Inh_L5_6_SST_KLHDC8A	0.647619	3	TRHDE	VCAN	KCTD8
Inh_L5_6_SST_MIR548F2	0.559006	2	ERBB4	GPC5
Inh_L5_6_SST_NPM1P10	0.70922	2	FBN2	SPON1
Inh_L5_6_SST_TH	0.723404	2	LOC105377567	CDH9
Micro_L1_3_TYROBP	0.824561	1	ADAM28
OPC_L1_6_PDGFRA	0.855769	1	LHFPL3
Oligo_L1_6_OPALIN	0.849365	1	ST18
