# Supplementary material for: A machine learning method for the discovery of minimum marker gene combinations for cell type identification from single-cell RNA sequencing
Source: HighWire-hosted journal article supplement (doi:10.1101/gr.275569.121), 2021-06-04
Supplement: Supplemental_Table_S2.xlsx [file Supplemental_Table_S2.xlsx]

## Sheet: Sheet1
Supplemental Table S2: NS-Forest v2.0 results for full Middle Temporal Gyrus.
clusterName	f-measure	markerCount	clusterName	1	2	3	4	5	6
Astro_L1_2_FGFR3_GFAP	0.757576	2	Astro_L1_2_FGFR3_GFAP	MT1F	ID3
Astro_L1_6_FGFR3_SLC14A1	0.870288	2	Astro_L1_6_FGFR3_SLC14A1	LOC105376917	SLC1A3
Endo_L2_6_NOSTRIN	0.862069	1	Endo_L2_6_NOSTRIN	EMCN
Exc_L2_3_LINC00507_FREM3	0.771556	2	Exc_L2_3_LINC00507_FREM3	PALMD	CUX2
Exc_L2_4_LINC00507_GLP2R	0.663507	3	Exc_L2_4_LINC00507_GLP2R	PENK	CALCRL	MOXD1
Exc_L2_LAMP5_LTK	0.665641	2	Exc_L2_LAMP5_LTK	LINC01500	CBLN2
Exc_L3_4_RORB_CARM1P1	0.679745	3	Exc_L3_4_RORB_CARM1P1	CCDC68	CARM1P1	PRSS12
Exc_L3_5_RORB_COL22A1	0.778509	2	Exc_L3_5_RORB_COL22A1	RMST	MME
Exc_L3_5_RORB_ESR1	0.87804	2	Exc_L3_5_RORB_ESR1	ANXA1	LOC105371677
Exc_L3_5_RORB_FILIP1L	0.651685	4	Exc_L3_5_RORB_FILIP1L	CUX2	NTNG1	COL5A2	LOC101928196
Exc_L3_5_RORB_TWIST2	0.265306	3	Exc_L3_5_RORB_TWIST2	TWIST2	LOC101927281	CCDC168
Exc_L4_5_FEZF2_SCN4B	0.864198	2	Exc_L4_5_FEZF2_SCN4B	LOC105376457	LOC105378657
Exc_L4_5_RORB_DAPK2	0.581717	3	Exc_L4_5_RORB_DAPK2	LINC01179	BARX2	LOC105374971
Exc_L4_5_RORB_FOLH1B	0.75345	3	Exc_L4_5_RORB_FOLH1B	LOC101927835	RBM20	NPY2R
Exc_L4_6_FEZF2_IL26	0.845455	2	Exc_L4_6_FEZF2_IL26	IFNG_AS1	IL26
Exc_L4_6_RORB_C1R	0.581683	3	Exc_L4_6_RORB_C1R	ITGA11	PKD2L1	MEGF10
Exc_L4_6_RORB_SEMA3E	0.759858	2	Exc_L4_6_RORB_SEMA3E	RPRM	LOC101928622
Exc_L5_6_FEZF2_ABO	0.861953	2	Exc_L5_6_FEZF2_ABO	SULF1	ADAMTSL1
Exc_L5_6_FEZF2_EFTUD1P1	0.811828	2	Exc_L5_6_FEZF2_EFTUD1P1	NPFFR2	LOC105377183
Exc_L5_6_RORB_TTC12	0.799615	3	Exc_L5_6_RORB_TTC12	TNNT2	LOC105371833	NPFFR2
Exc_L5_6_SLC17A7_IL15	0.767544	3	Exc_L5_6_SLC17A7_IL15	NR4A2	NPNT	ERG
Exc_L5_6_THEMIS_C1QL3	0.786854	3	Exc_L5_6_THEMIS_C1QL3	LINC00343	PXDN	THEMIS
Exc_L5_6_THEMIS_CRABP1	0.838384	2	Exc_L5_6_THEMIS_CRABP1	OLFML2B	SNTB1
Exc_L5_6_THEMIS_DCSTAMP	0.776398	2	Exc_L5_6_THEMIS_DCSTAMP	LOC101928196	LOC105378486
Exc_L5_6_THEMIS_FGF10	0.56701	2	Exc_L5_6_THEMIS_FGF10	LOC101928964	GAS2L3
Exc_L6_FEZF2_OR2T8	0.727273	4	Exc_L6_FEZF2_OR2T8	SLC15A5	IGFBP3	SLITRK6	PCOLCE2
Exc_L6_FEZF2_SCUBE1	0.737179	2	Exc_L6_FEZF2_SCUBE1	LOC105379054	PIK3C2G
Inh_L1_2_GAD1_MC4R	0.618893	2	Inh_L1_2_GAD1_MC4R	ARHGAP36	ADAM33
Inh_L1_2_LAMP5_DBP	0.344828	2	Inh_L1_2_LAMP5_DBP	CPLX3	CBLN4
Inh_L1_2_PAX6_CDH12	0.800654	2	Inh_L1_2_PAX6_CDH12	TGFBR2	LOC101927870
Inh_L1_2_PAX6_TNFAIP8L3	0.833333	2	Inh_L1_2_PAX6_TNFAIP8L3	SP8	LINC01497
Inh_L1_2_SST_BAGE2	0.525	2	Inh_L1_2_SST_BAGE2	BAGE2	LOC105377436
Inh_L1_2_VIP_LBH	0.494505	2	Inh_L1_2_VIP_LBH	C18orf42	LOC105379146
Inh_L1_2_VIP_PCDH20	0.621302	2	Inh_L1_2_VIP_PCDH20	ANGPT1	VIP
Inh_L1_2_VIP_TSPAN12	0.547945	2	Inh_L1_2_VIP_TSPAN12	DCN	LINC01539
Inh_L1_3_PAX6_SYT6	0.823529	2	Inh_L1_3_PAX6_SYT6	CNR1	PLCXD3
Inh_L1_3_SST_CALB1	0.636766	1	Inh_L1_3_SST_CALB1	LOC101929028
Inh_L1_3_VIP_ADAMTSL1	0.733696	2	Inh_L1_3_VIP_ADAMTSL1	DACH2	PCDH18
Inh_L1_3_VIP_CCDC184	0.480769	2	Inh_L1_3_VIP_CCDC184	KCNH8	SCML4
Inh_L1_3_VIP_CHRM2	0.55773	2	Inh_L1_3_VIP_CHRM2	LOC100421401	LOC101060145
Inh_L1_3_VIP_GGH	0.530303	2	Inh_L1_3_VIP_GGH	GGH	LOC105375473
Inh_L1_4_LAMP5_LCP2	0.815868	2	Inh_L1_4_LAMP5_LCP2	KIT	CPLX3
Inh_L1_4_VIP_CHRNA6	0.555556	2	Inh_L1_4_VIP_CHRNA6	LOC101928923	CCDC141
Inh_L1_4_VIP_OPRM1	0.583333	3	Inh_L1_4_VIP_OPRM1	PCP4	LINC01583	SLC22A3
Inh_L1_4_VIP_PENK	0.606061	2	Inh_L1_4_VIP_PENK	EGFEM1P	LOC105371331
Inh_L1_SST_CHRNA4	0.666667	3	Inh_L1_SST_CHRNA4	ANKFN1	SEMA3C	CXCL14
Inh_L1_SST_NMBR	0.897552	2	Inh_L1_SST_NMBR	NDNF	SV2C
Inh_L2_3_VIP_CASC6	0.561798	3	Inh_L2_3_VIP_CASC6	LRRC63	CASC6	LOC105370456
Inh_L2_4_PVALB_WFDC2	0.790255	2	Inh_L2_4_PVALB_WFDC2	SLC9A9	TAC1
Inh_L2_4_SST_FRZB	0.518293	4	Inh_L2_4_SST_FRZB	EYS	HPSE2	NOS1	MYO5B
Inh_L2_4_VIP_CBLN1	0.680851	2	Inh_L2_4_VIP_CBLN1	HTR2C	MME
Inh_L2_4_VIP_SPAG17	0.529412	2	Inh_L2_4_VIP_SPAG17	SLC7A11	LINC00836
Inh_L2_5_PVALB_SCUBE3	0.821429	2	Inh_L2_5_PVALB_SCUBE3	COL15A1	LOC401478
Inh_L2_5_VIP_SERPINF1	0.615385	3	Inh_L2_5_VIP_SERPINF1	TAC3	TSHZ2	LINC01583
Inh_L2_5_VIP_TYR	0.570175	2	Inh_L2_5_VIP_TYR	TAC3	COL15A1
Inh_L2_6_LAMP5_CA1	0.837379	2	Inh_L2_6_LAMP5_CA1	EYA4	TMEM255A
Inh_L2_6_VIP_QPCT	0.752688	2	Inh_L2_6_VIP_QPCT	PCP4	IGFBP7
Inh_L3_5_SST_ADGRG6	0.663717	2	Inh_L3_5_SST_ADGRG6	ADGRG6	PROM1
Inh_L3_6_SST_HPGD	0.65625	3	Inh_L3_6_SST_HPGD	HPGD	FAM89A	MOXD1
Inh_L3_6_SST_NPY	0.985915	1	Inh_L3_6_SST_NPY	NPY
Inh_L3_6_VIP_HS3ST3A1	0.572034	2	Inh_L3_6_VIP_HS3ST3A1	IQGAP2	ABI3BP
Inh_L4_5_PVALB_MEPE	0.670732	3	Inh_L4_5_PVALB_MEPE	SPP1	HGF	MEPE
Inh_L4_5_SST_STK32A	0.55102	2	Inh_L4_5_SST_STK32A	SLC9A2	STK32A
Inh_L4_6_PVALB_SULF1	0.550528	2	Inh_L4_6_PVALB_SULF1	SULF1	CPED1
Inh_L4_6_SST_B3GAT2	0.610599	3	Inh_L4_6_SST_B3GAT2	NMU	FREM1	TAC3
Inh_L4_6_SST_GXYLT2	0.617978	3	Inh_L4_6_SST_GXYLT2	QRFPR	SLC17A8	LOC101929667
Inh_L5_6_GAD1_GLP1R	0.746269	3	Inh_L5_6_GAD1_GLP1R	CPED1	SEMA3C	BCHE
Inh_L5_6_PVALB_LGR5	0.555556	3	Inh_L5_6_PVALB_LGR5	ANKRD34B	LOC401478	CPED1
Inh_L5_6_SST_KLHDC8A	0.610687	2	Inh_L5_6_SST_KLHDC8A	LOC100996671	LOC105377701
Inh_L5_6_SST_MIR548F2	0.634328	3	Inh_L5_6_SST_MIR548F2	LYPD6	PAWR	GPC5
Inh_L5_6_SST_NPM1P10	0.779817	2	Inh_L5_6_SST_NPM1P10	SPON1	FBN2
Inh_L5_6_SST_TH	0.714286	2	Inh_L5_6_SST_TH	LOC102724957	TH
Micro_L1_3_TYROBP	0.910931	2	Micro_L1_3_TYROBP	CSF1R	APBB1IP
OPC_L1_6_PDGFRA	0.882716	2	OPC_L1_6_PDGFRA	PCDH15	PDGFRA
Oligo_L1_6_OPALIN	0.929067	2	Oligo_L1_6_OPALIN	ENPP2	CERCAM
